# Supplementary material
Source: MDPI journal article supplement (https://www.mdpi.com/1873-149X/28/4/33)
Supplement: s1 [file s1]

# Supplementary Materials

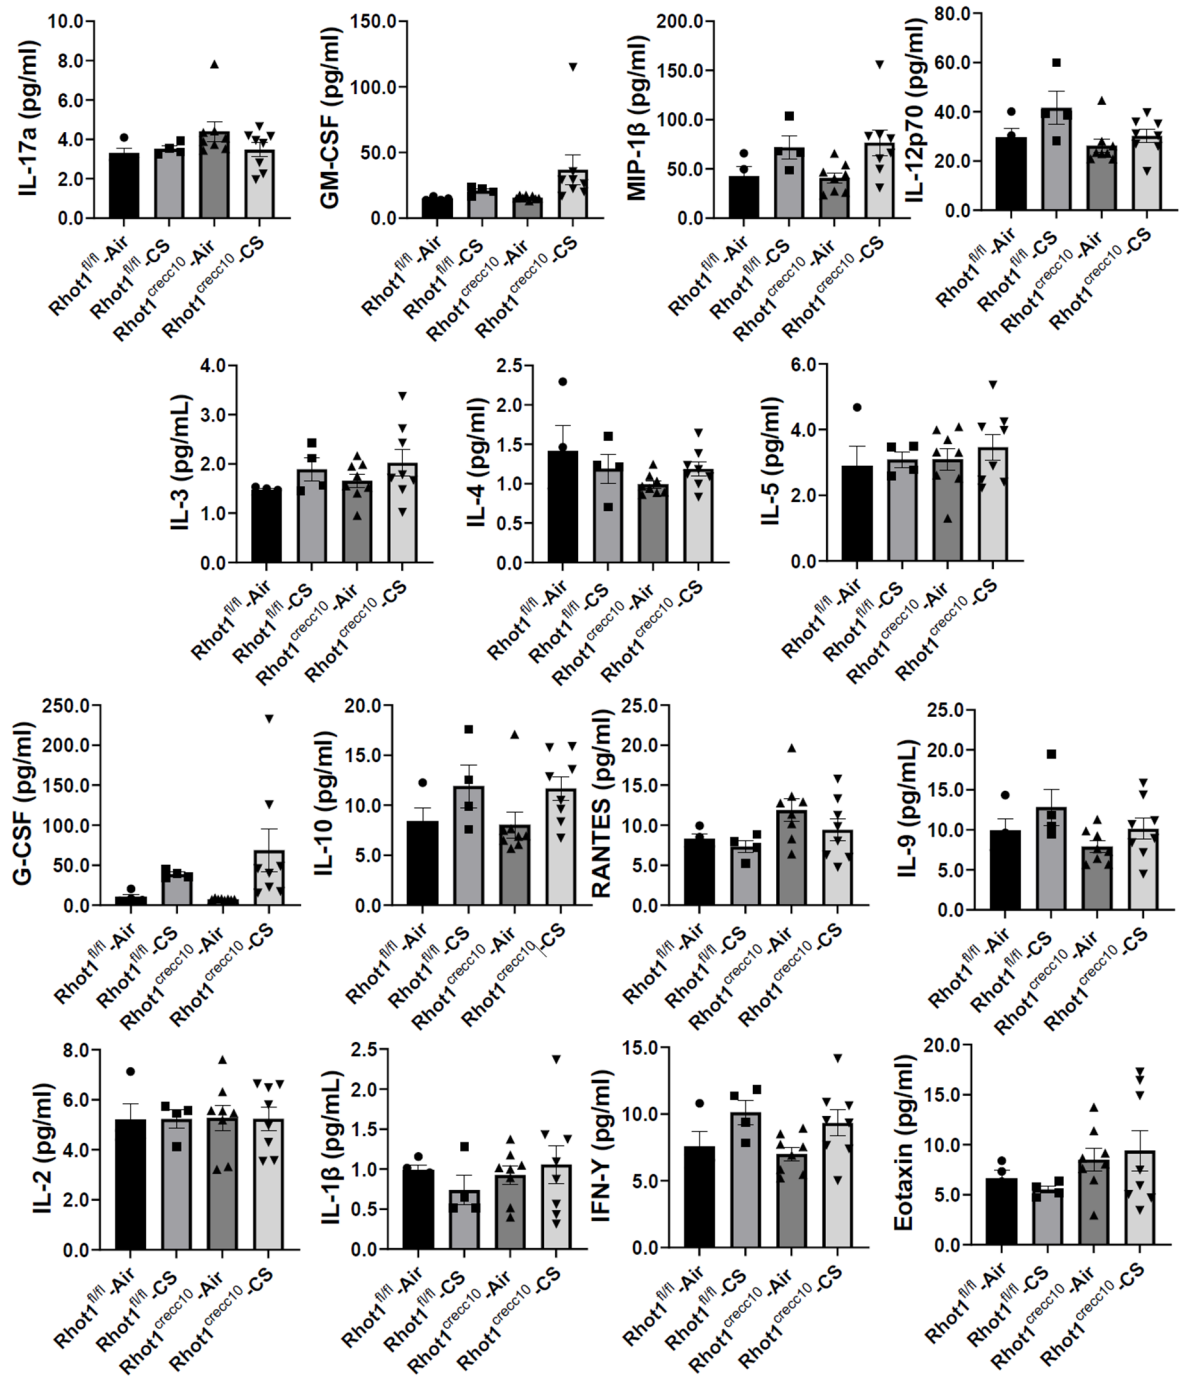

**Figure S1.** Differential expression of cytokines in epithelial cell-specific Rhot1 deleted and WT mice: Rhot1<sup>fl/fl</sup> (WT) and Rhot1<sup>fl/fl</sup> CreCC10<sup>+/-</sup> (Rhot1 flp CreCC10<sup>+/-</sup> and Rhot1 flp CreCC10<sup>+/-</sup>) mice were exposed to room air and CS (mainstream) for 3 days (acute exposure). Expression levels of pro-inflammatory and inflammatory mediators in BAL fluid room air and CS-exposed mice for 3 days was determined using Bio-Plex Pro 23-plex cytokine assay. Data are shown as mean ± SEM (n = 5 to 8 per group).

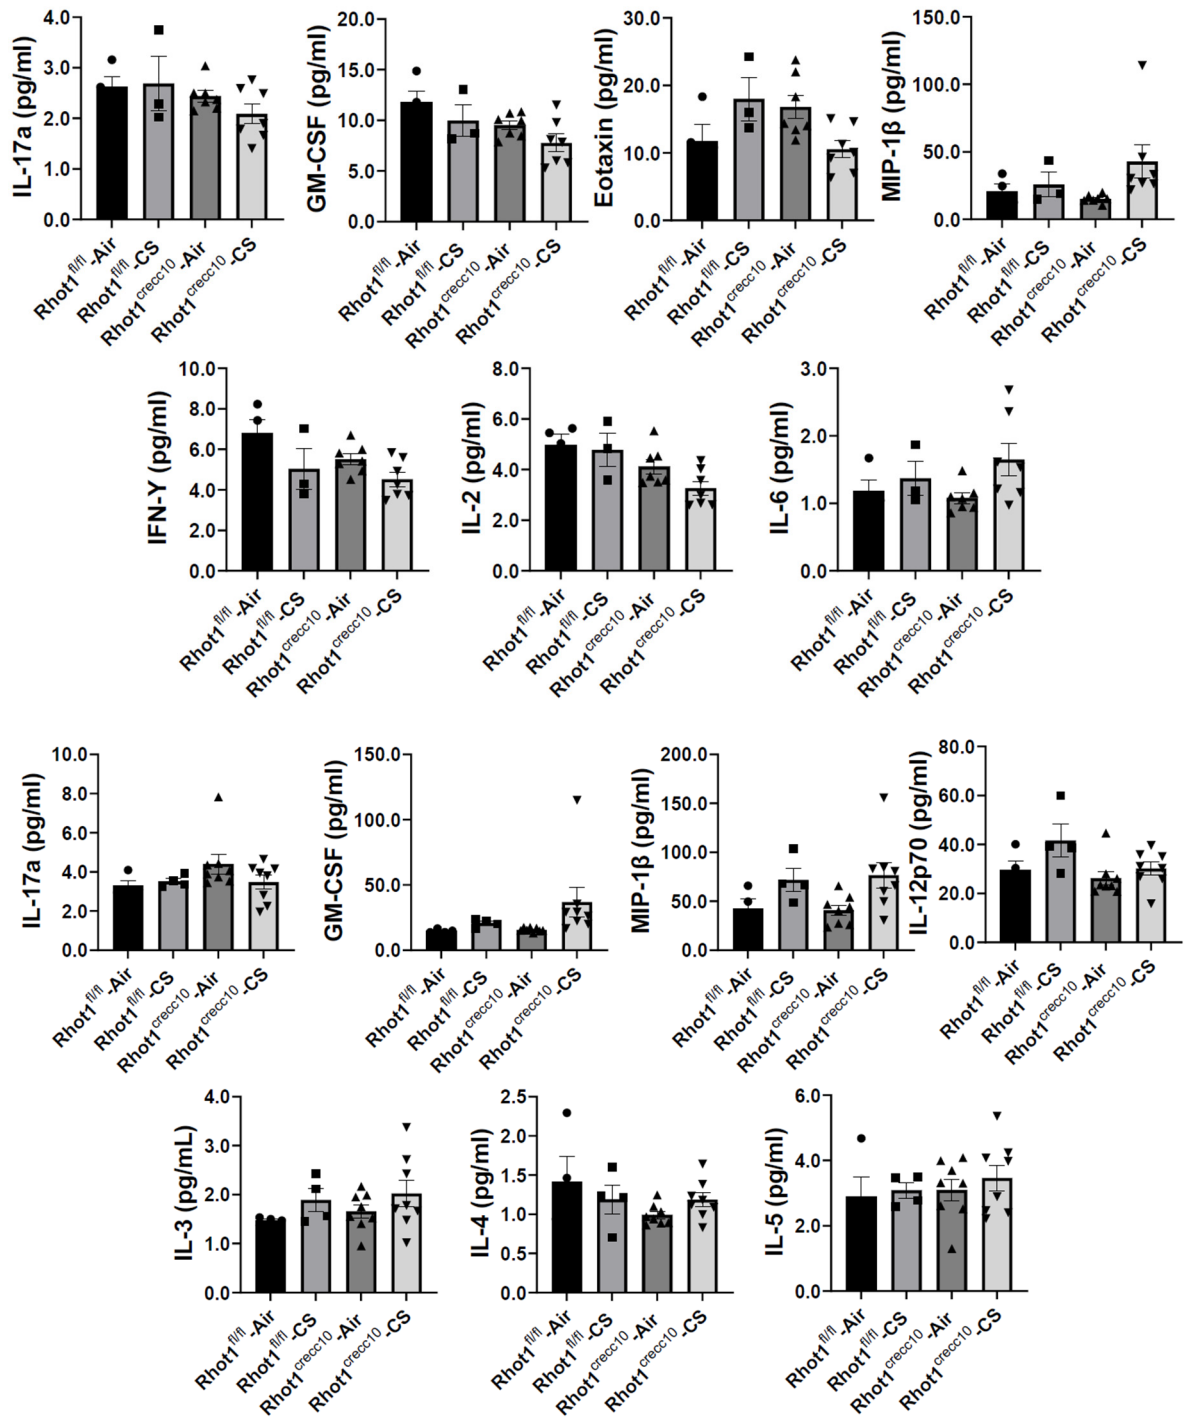

**Figure S2.** Differential expression of cytokines in epithelial cell-specific Rhot1 deleted and WT mice: Rhot1<sup>fl/fl</sup> (WT) and Rhot1<sup>CreCC10</sup> (Rhot1 flp CreCC10<sup>-/-</sup> and Rhot1 flp CreCC10<sup>+/-</sup>) mice were exposed to room air and CS (mainstream) for 4 months (sub-chronic exposure). Expression levels of pro-inflammatory and inflammatory mediators in BAL fluid room air and CS-exposed mice for 4 months as determined using Bio-Plex Pro 23-plex cytokine assay. Data are shown as mean  $\pm$  SEM (n = 3 to 7 per group).
